# Supplementary material for: A burst of ABC genes in the genome of the polyphagous spider mite Tetranychus urticae
Source: PubMed Central journal article supplement (PMC3724490; doi:10.1186/1471-2164-14-317), 2013-05-10

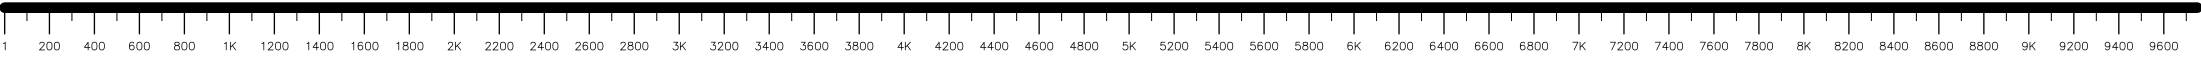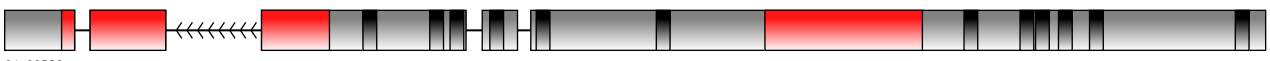

01g00580

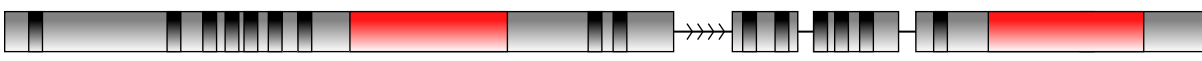

01g15090

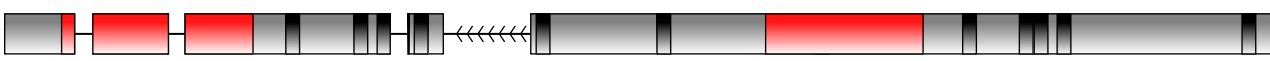

11g05030

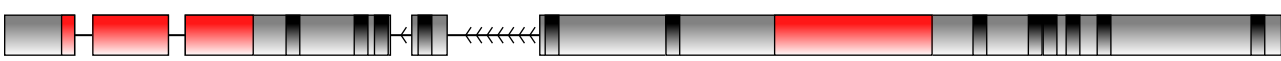

11g05040

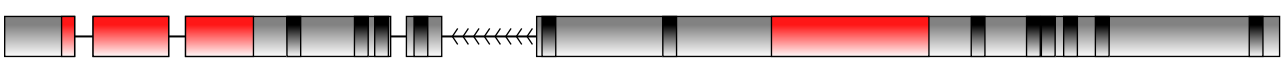

11g05200

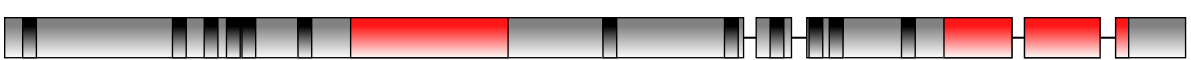

15g01990

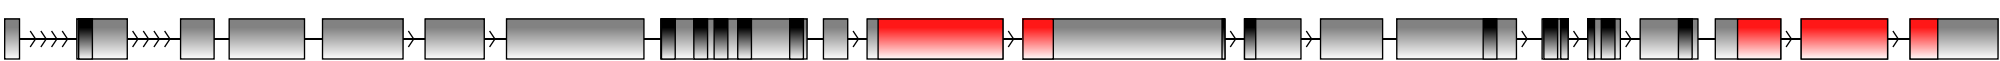

25g01640

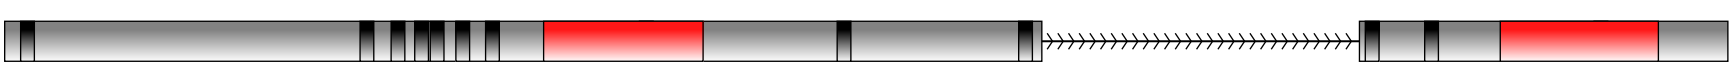

27g01890

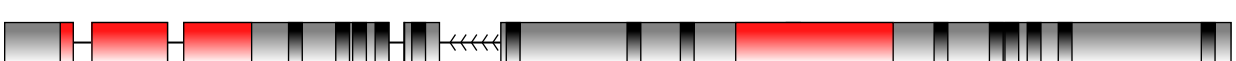

30g01960

### ABCA subfamily

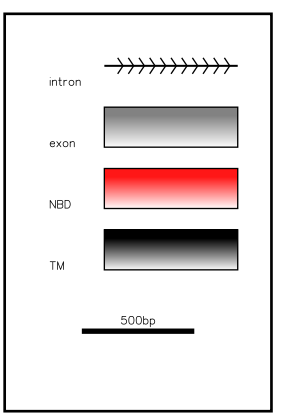

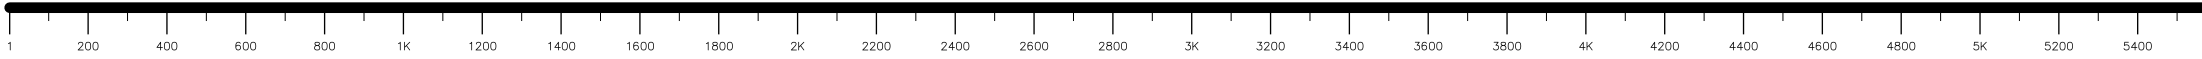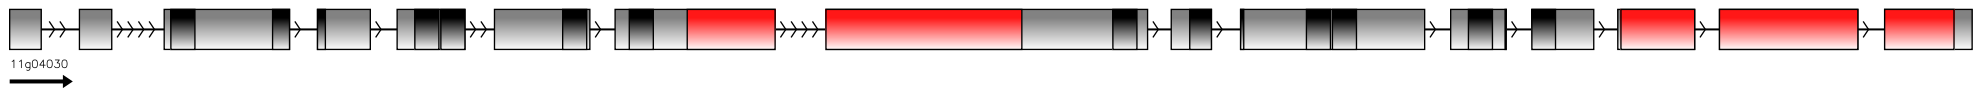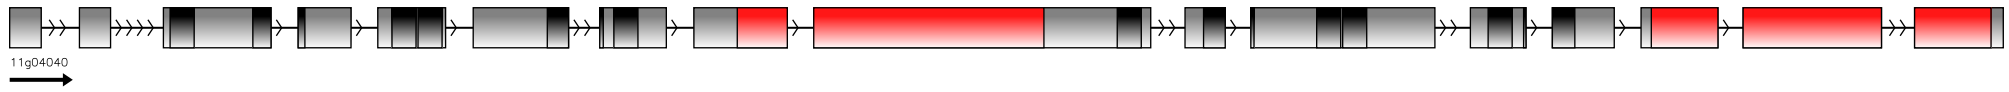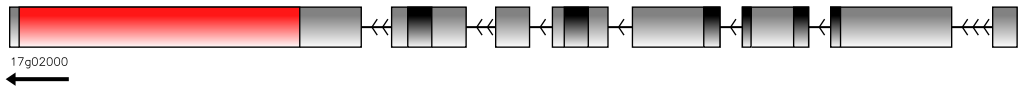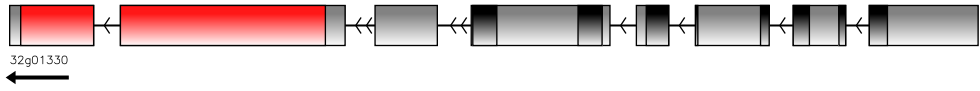

ABCB subfamily

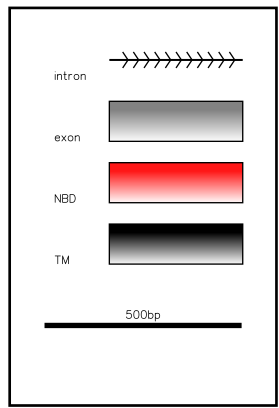

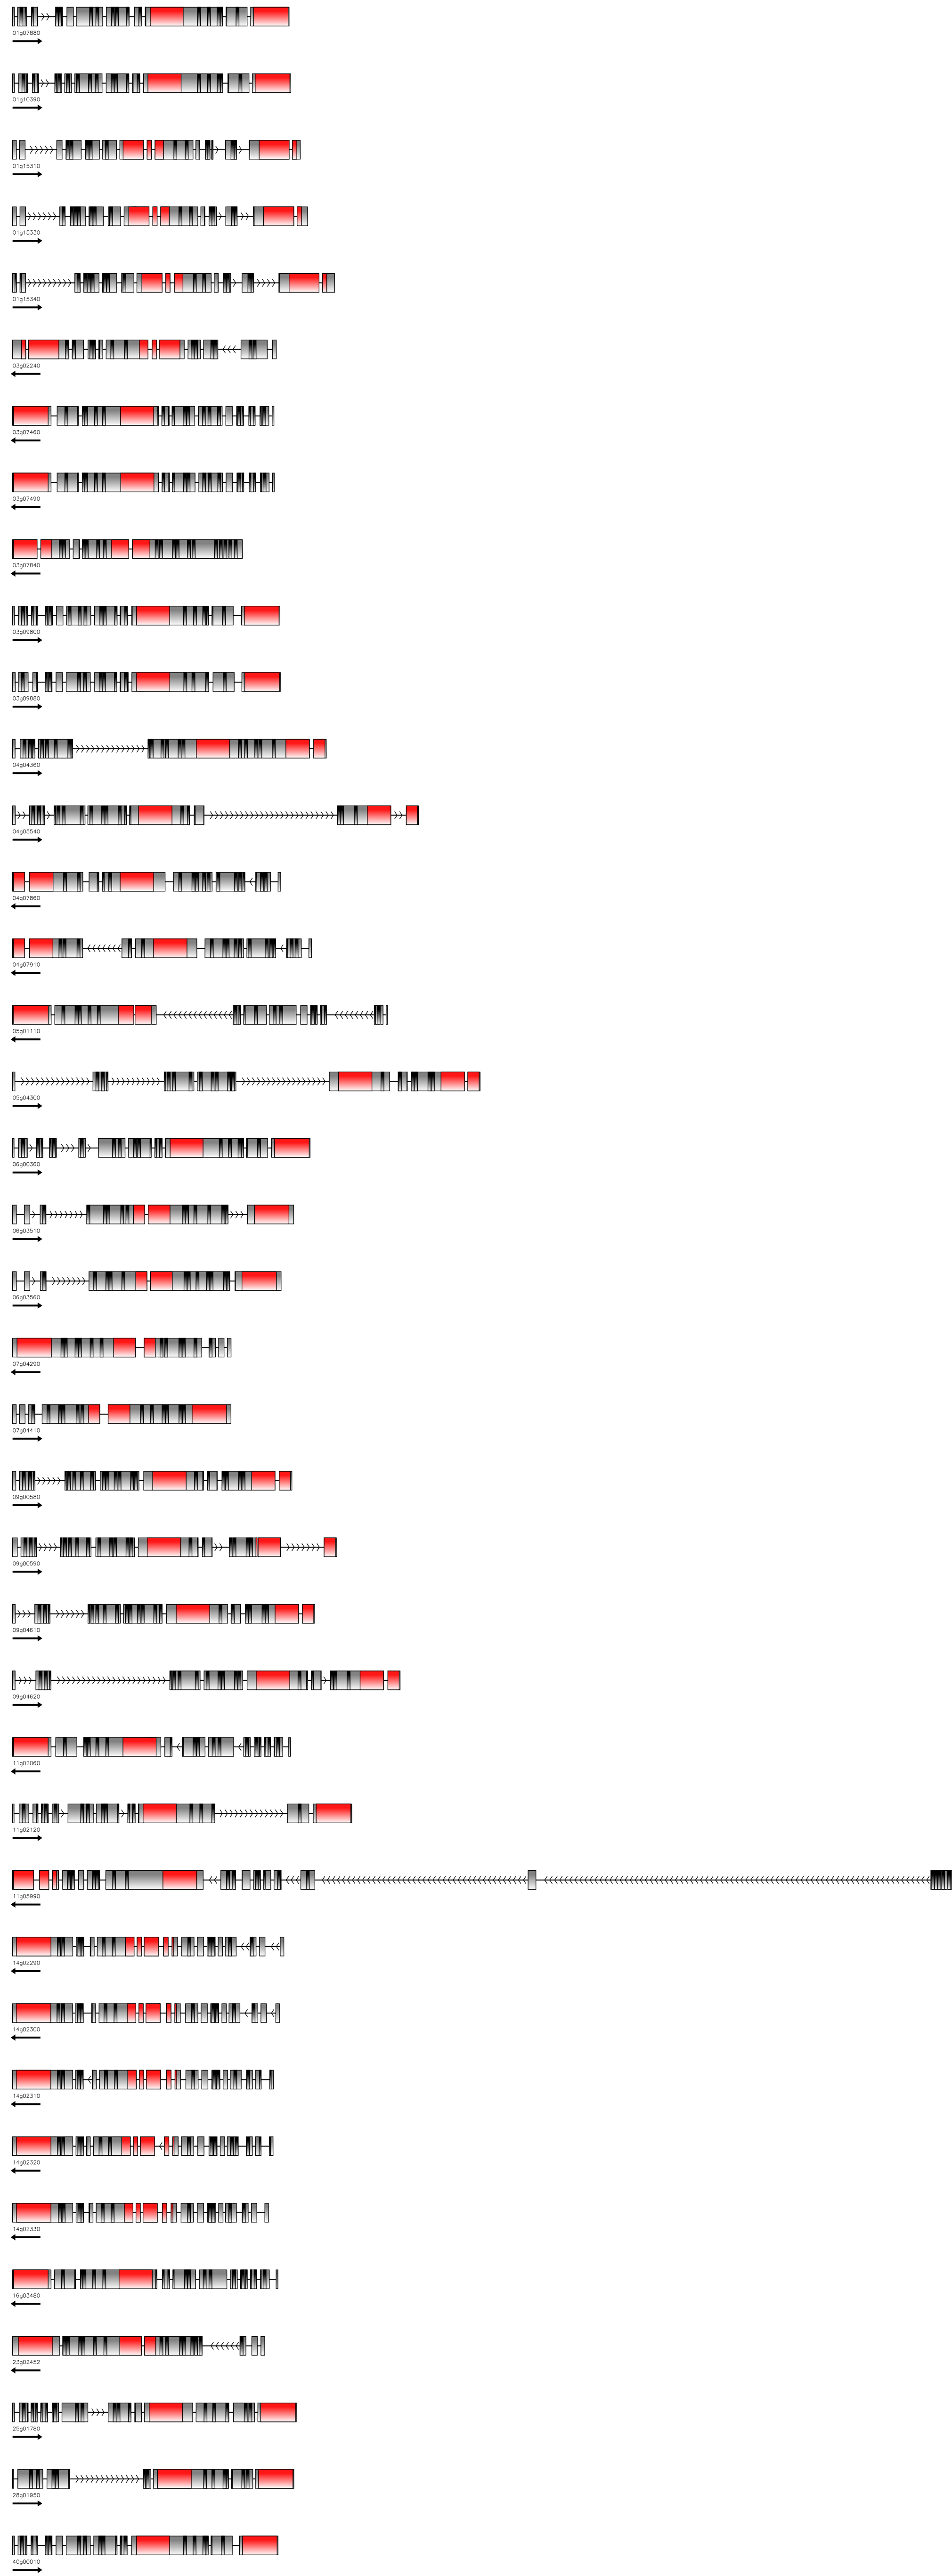

ABCC subfamily

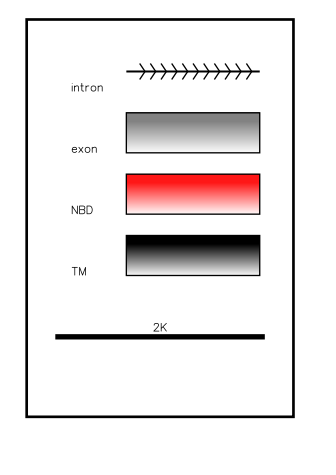

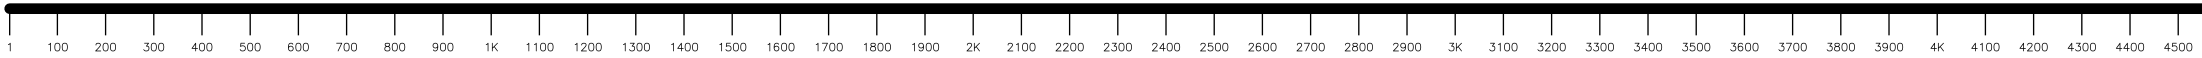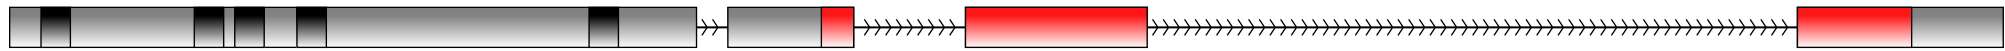

05g06640  
→

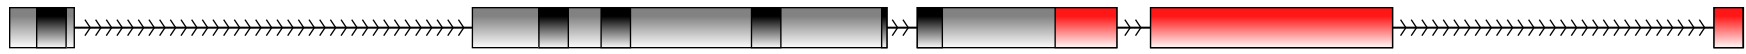

35g01360  
→

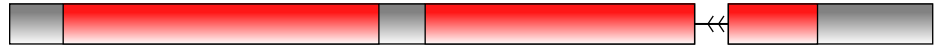

30g01400  
←

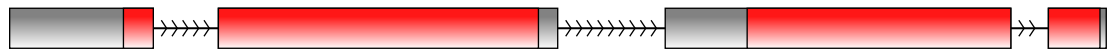

20g02610  
→

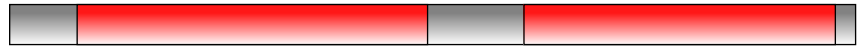

29g00620  
→

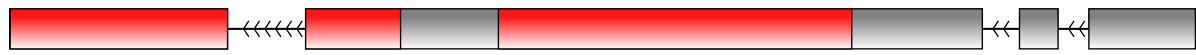

32g00490  
←

ABCD,E and F subfamily

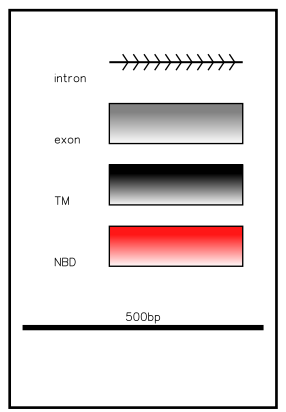

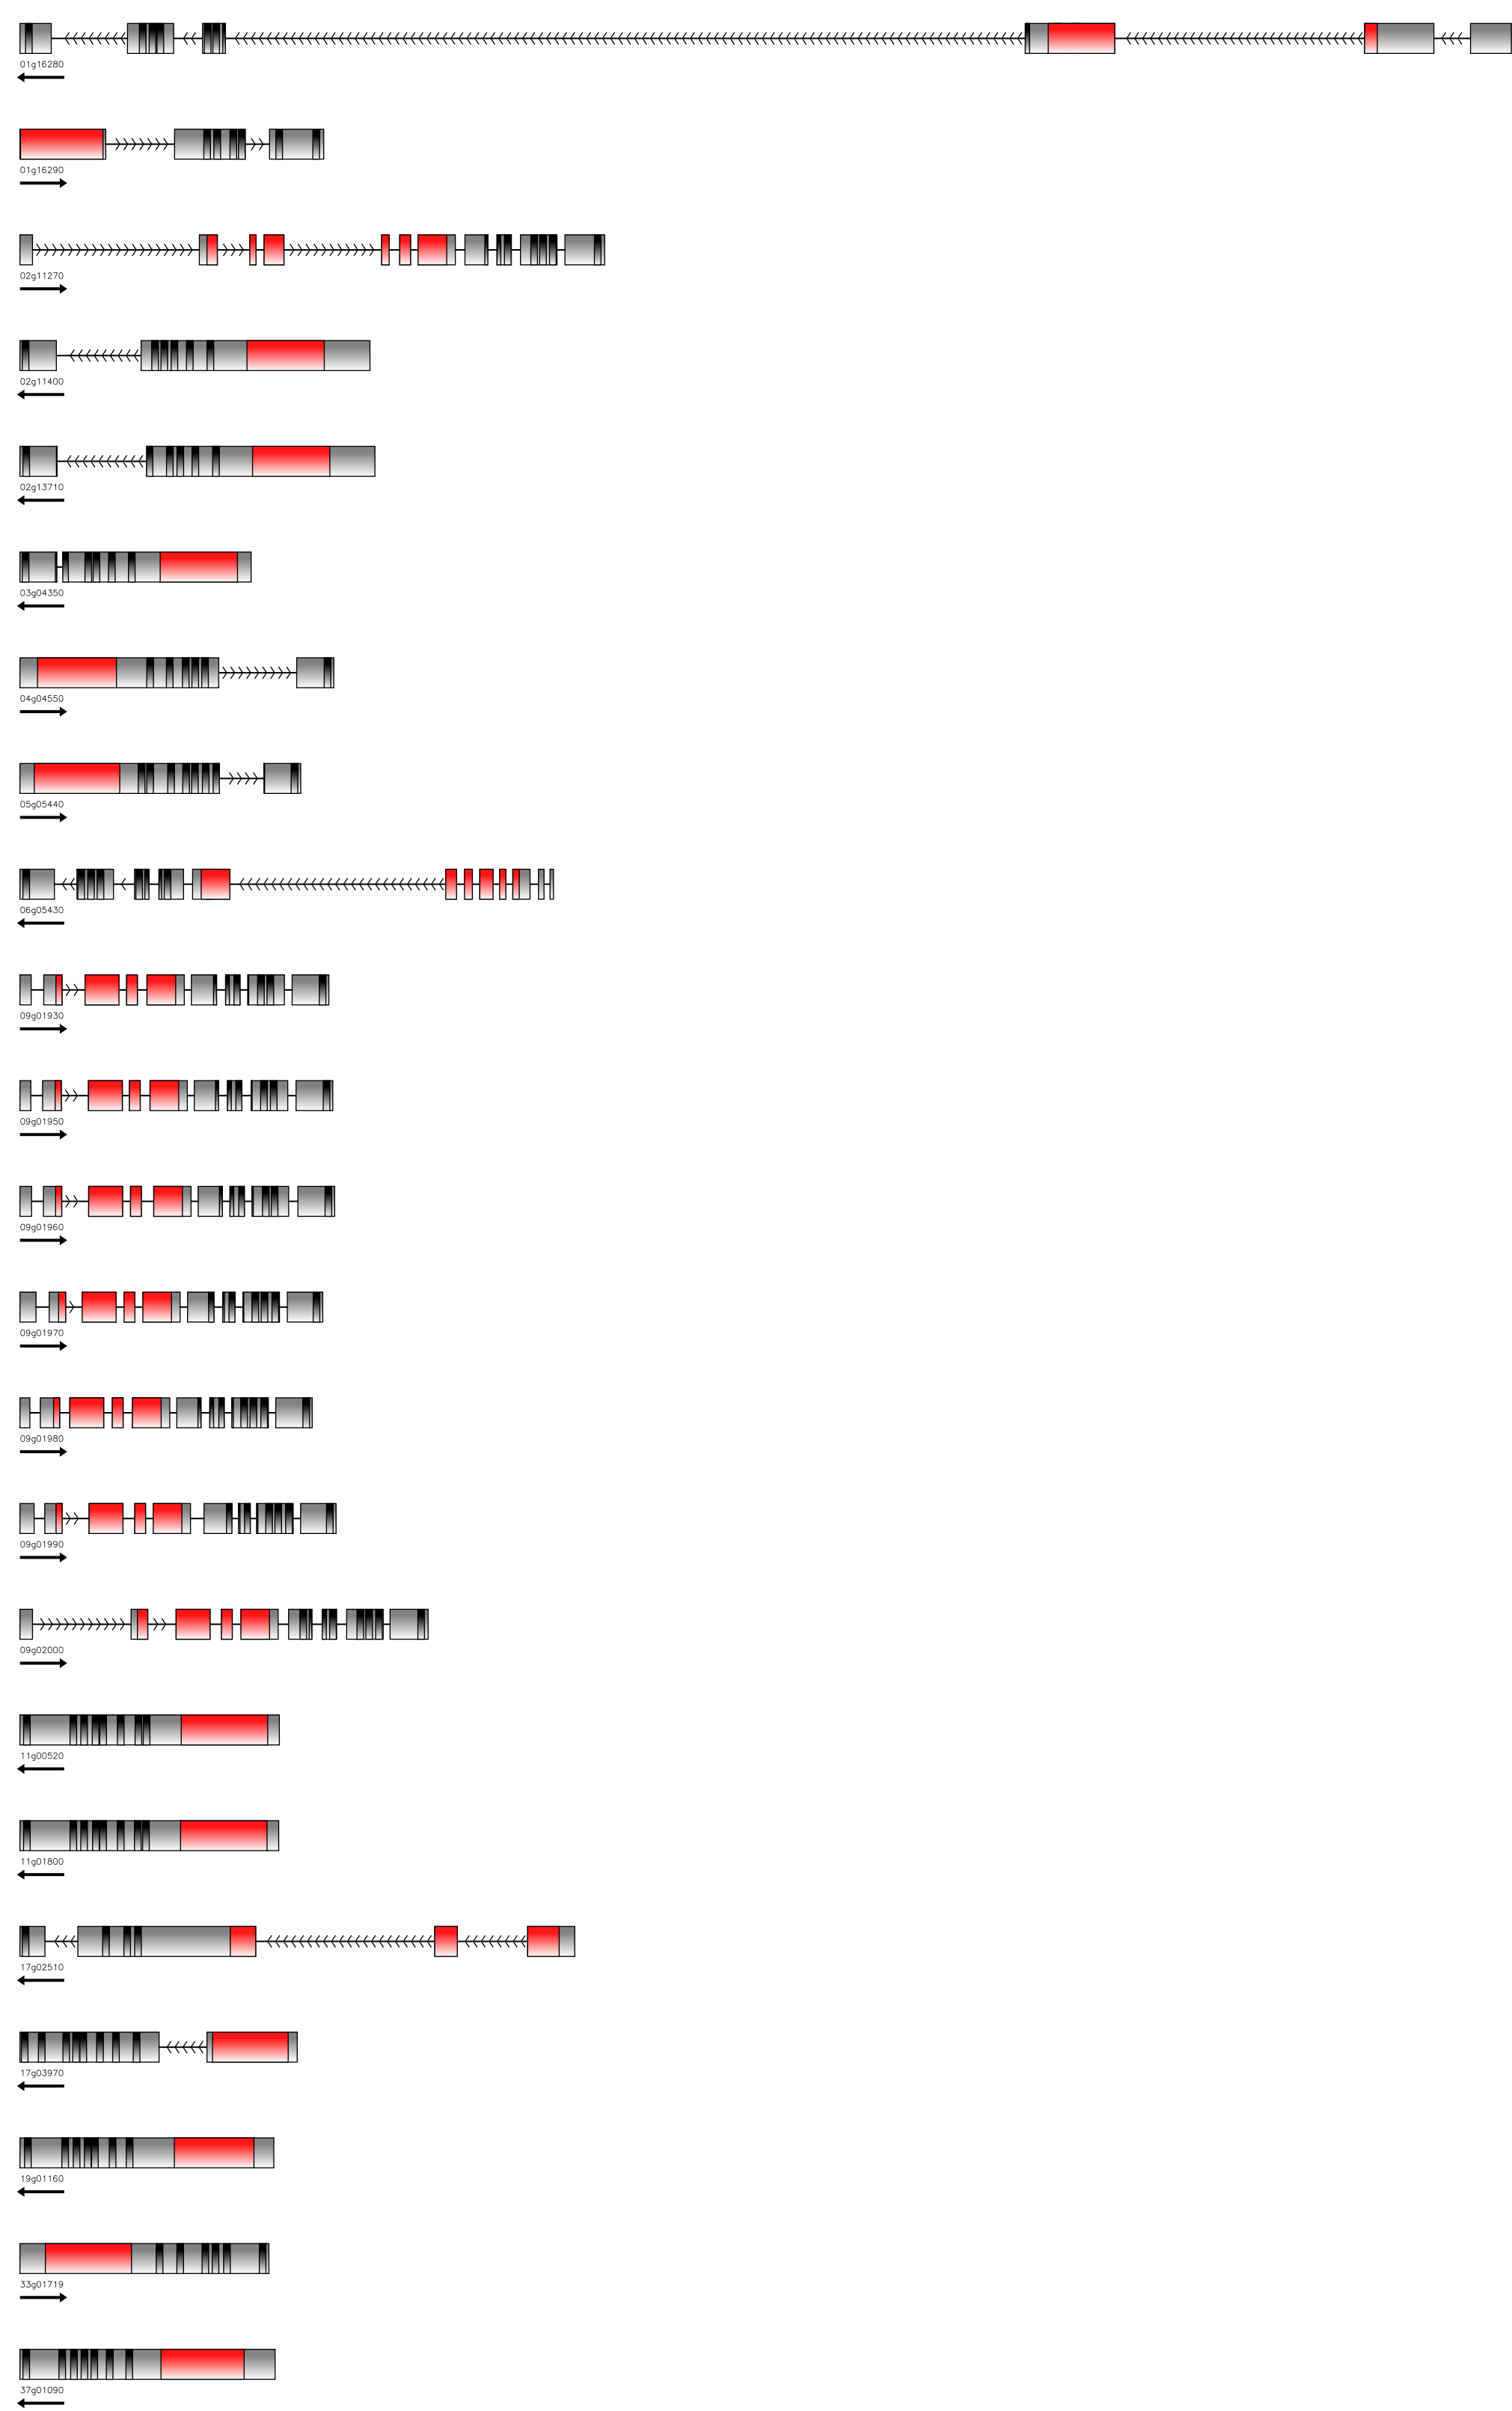

ABCG subfamily

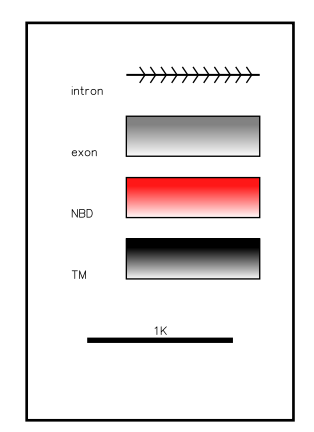

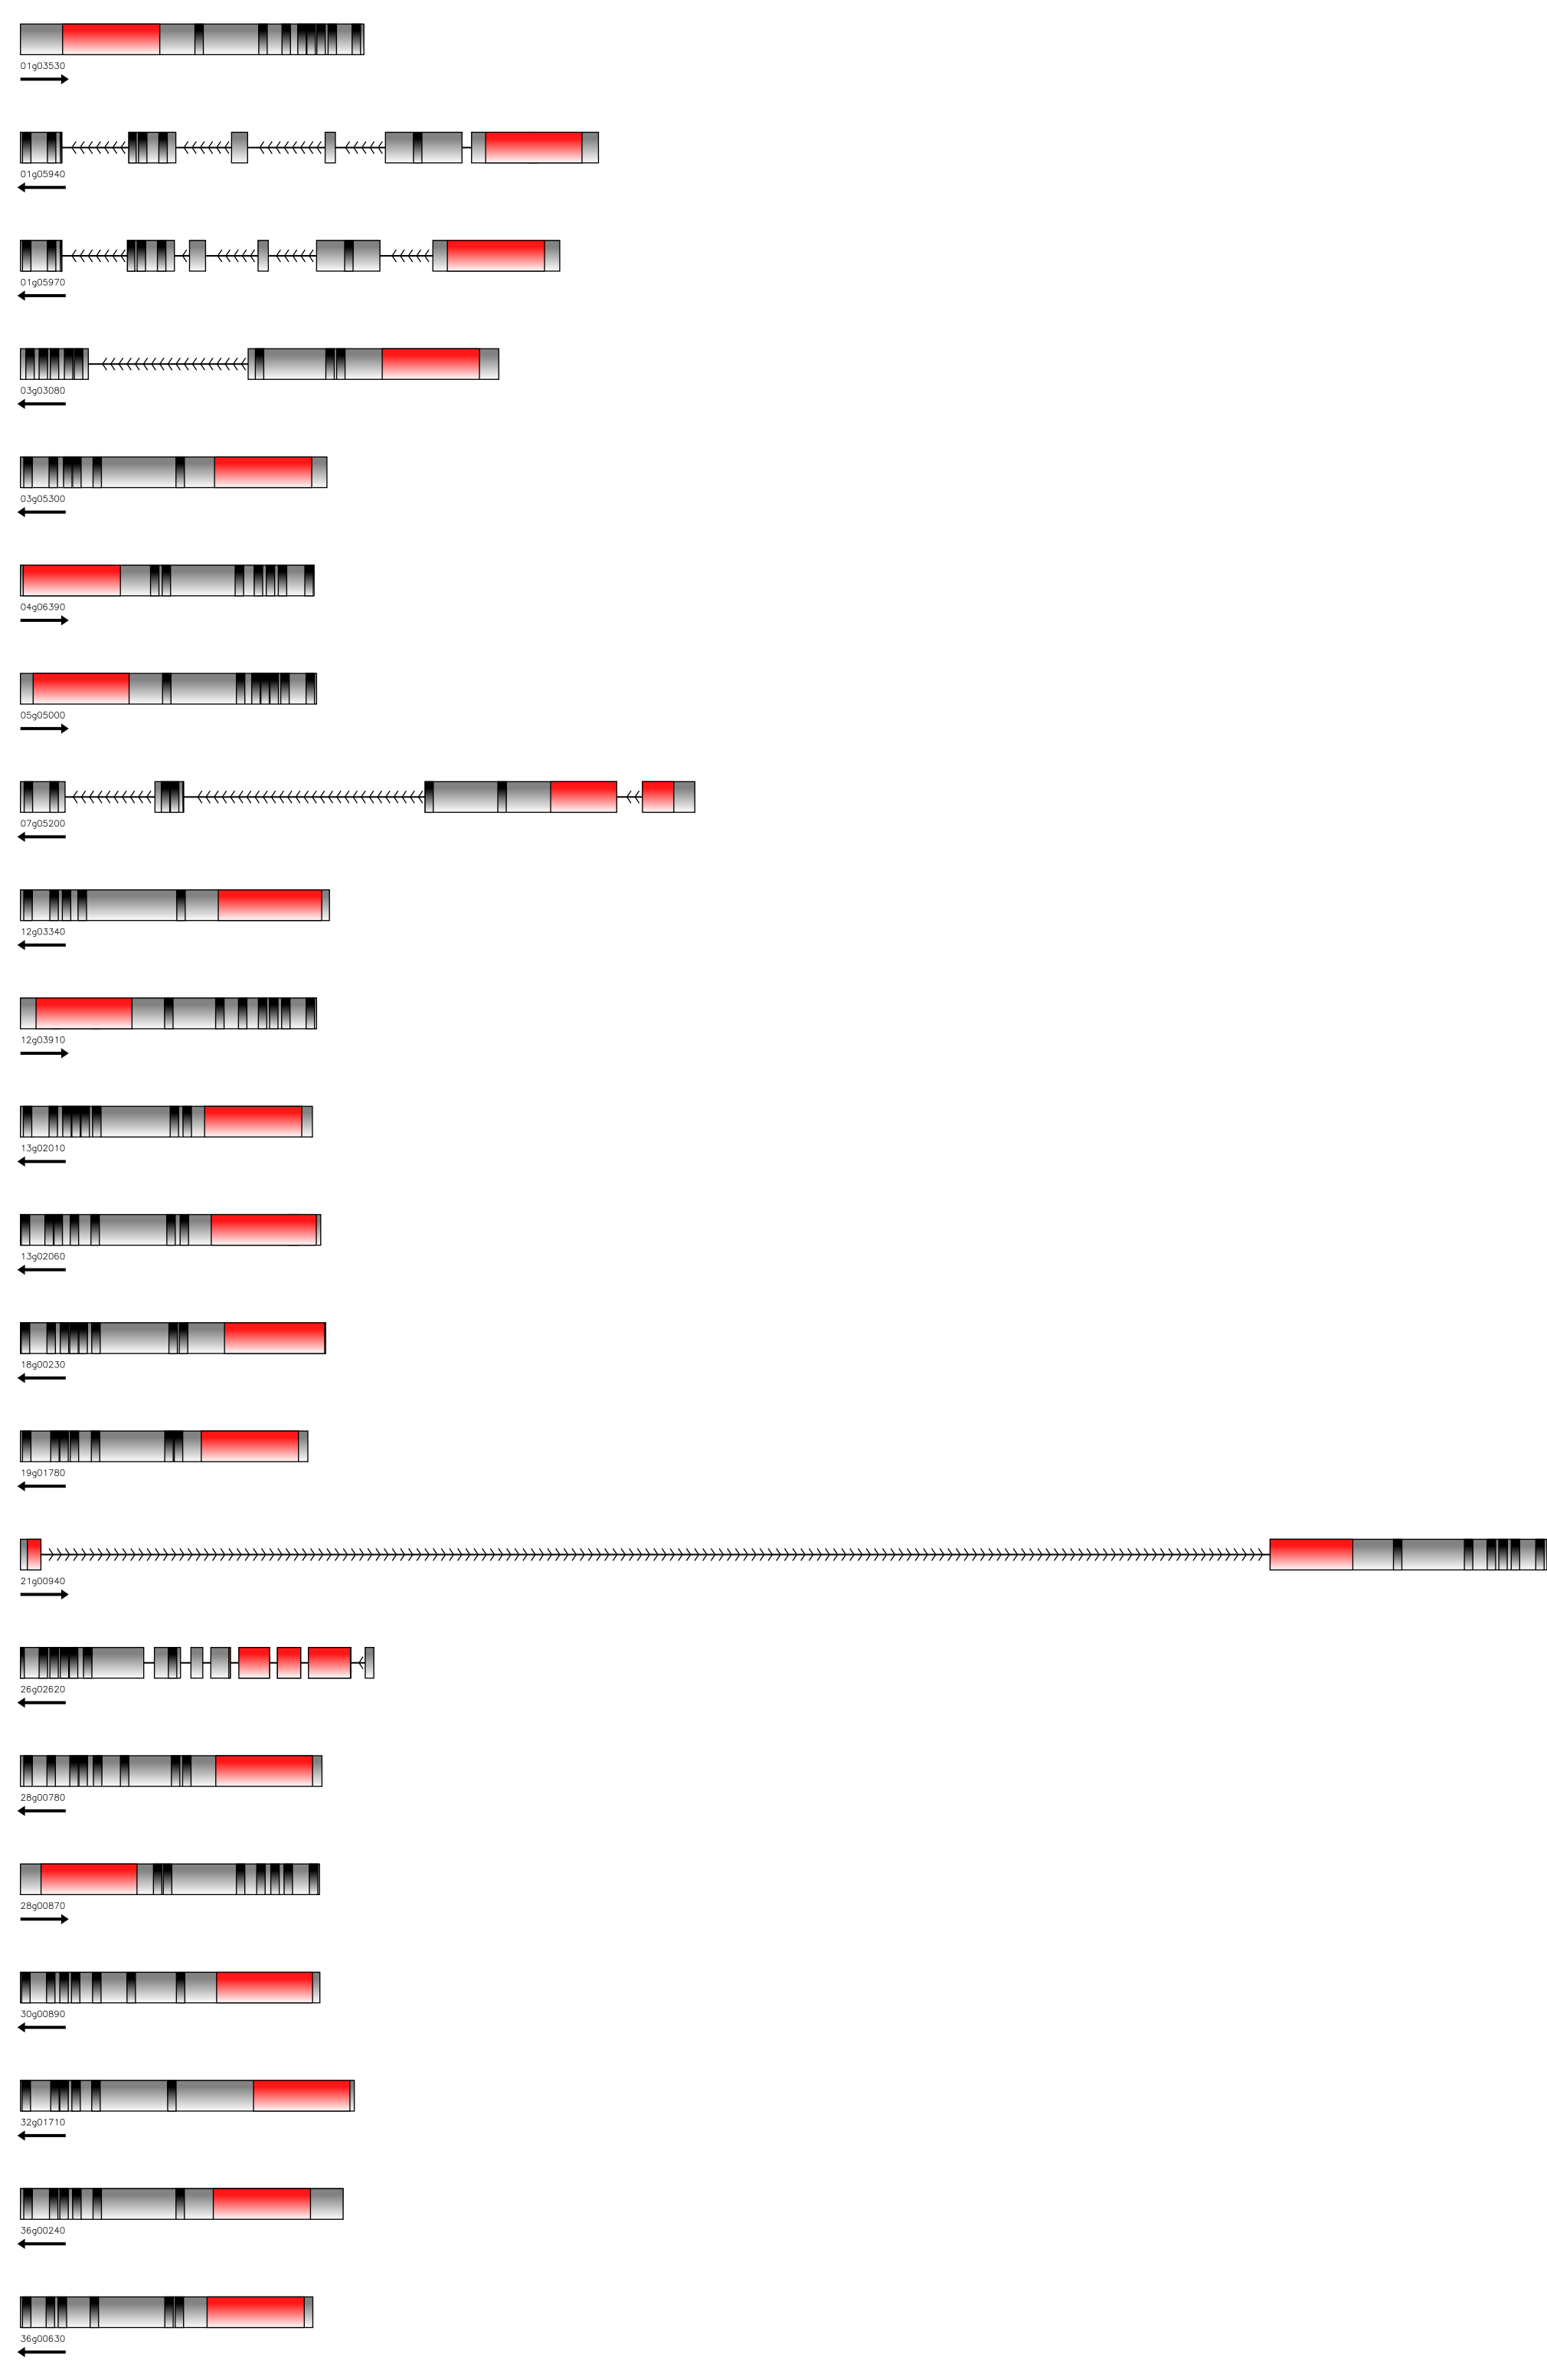

ABCH subfamily

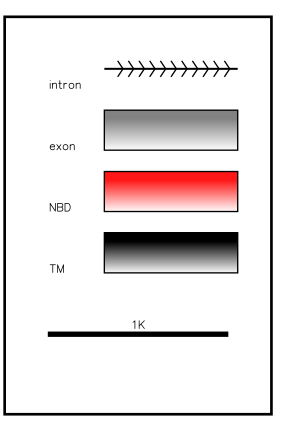

Supplement: 1471-2164-14-317-S3.pdf [file 1471-2164-14-317-S3.pdf]
