# Supplementary material for: A burst of ABC genes in the genome of the polyphagous spider mite Tetranychus urticae
Source: PubMed Central journal article supplement (PMC3724490; doi:10.1186/1471-2164-14-317), 2013-05-10
Supplement: 1471-2164-14-317-S1.pdf [file 1471-2164-14-317-S1.pdf]

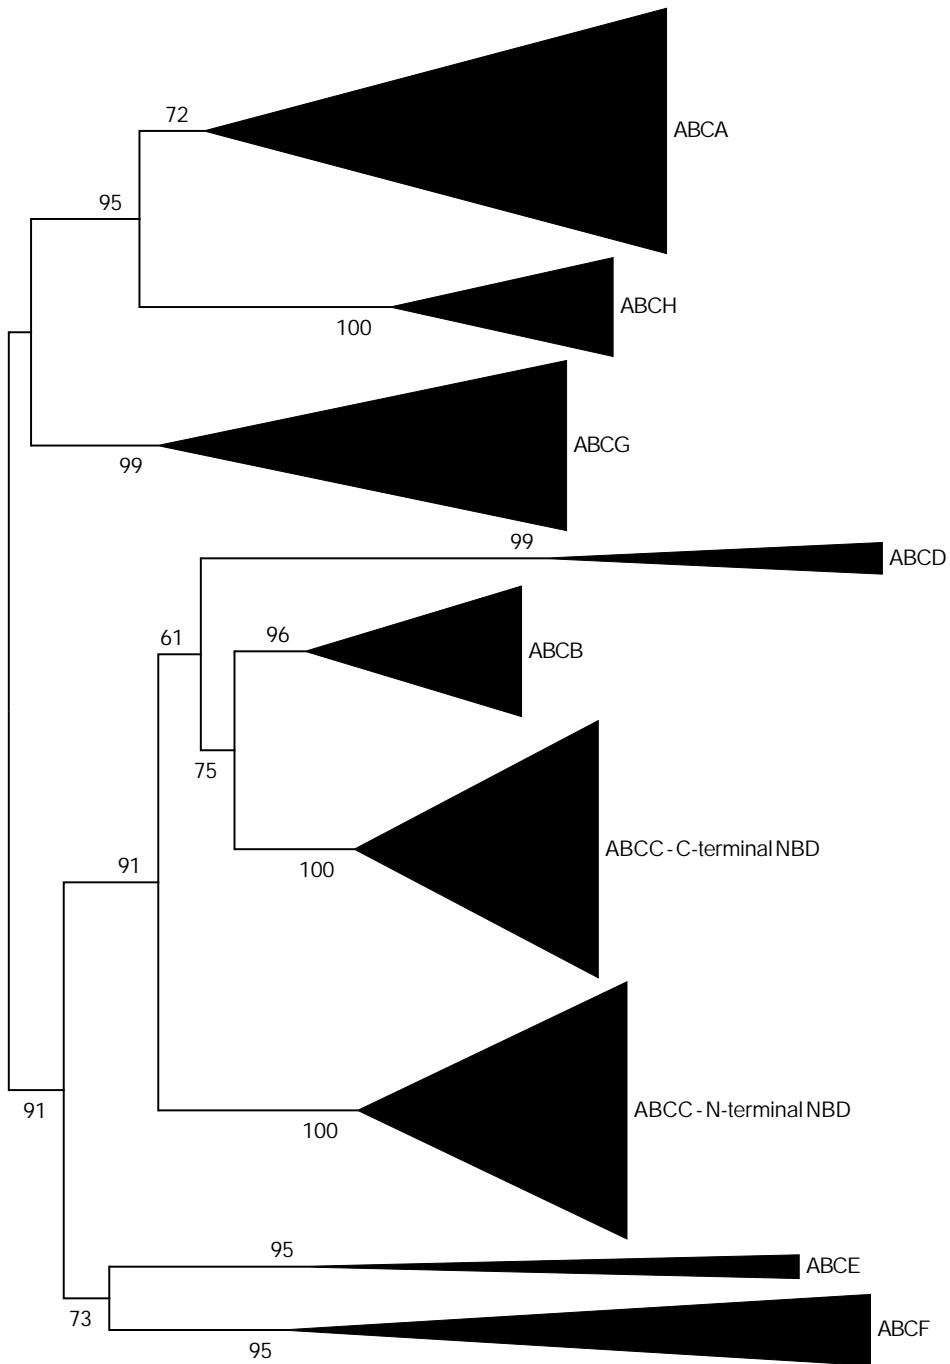

0.5
